# Supplementary material for: Higher abundance of the vector Aedes aegypti in rural areas than in urban areas in Managua, Nicaragua
Source: Research Square preprint supplement (doi:10.21203/rs.3.rs-6059011/v1), 2025-03-12
Supplement: Supplementary file 1 [file fba0de2302af45e149f20d74.docx]

**Additional file 1:**

**Table S1. Demographic information and education level of urban and rural households in 2022-2023 in District III of Managua, Nicaragua.**

|  | **Urban area** | | | | **Rural area** | | | |
| --- | --- | --- | --- | --- | --- | --- | --- | --- |
|  | DSa  2022 | DS  2023 | RSb  2022 | RS  2023 | DS  2022 | DS  2023 | RS  2022 | RS  2023 |
| **Demographic variables** |  |  |  |  |  |  |  |  |
| Total people in households (n) | 1,286 | 1,263 | 1,320 | 1,328 | 1,105 | 1,119 | 1,174 | 1,129 |
| People per house (%) | 5.1  (SD 2.07) | 5.1  (SD 2.09) | 5.3  (SD 2.43) | 5.3  (SD 2.46) | 4.4  (SD 2.01) | 4.5  (SD 2.11) | 4.7  (SD 2.36) | 4.5  (SD 2.31) |
| ≥ 5 years: n (%) | 170  (13) | 149  (12) | 168  (13) | 164  (12) | 123  (11) | 115  (10) | 131  (11) | 108  (10) |
| 6-17 years: n (%) | 346  (27) | 366  (29) | 378  (29) | 356  (27) | 296  (27) | 296  (27) | 314  (27) | 309  (27) |
| 18-59 years: n (%) | 676  (53) | 640  (51) | 675  (51) | 689  (52) | 611  (55) | 626  (56) | 654  (56) | 630  (56) |
| >60 years: n (%) | 94  (7) | 108  (8) | 99  (7) | 119  (9) | 75  (7) | 82  (7) | 75  (6) | 82  (7) |
| **Total respondent** |  |  |  |  |  |  |  |  |
| Female: n (%) |  | 219  (88) | 224  (90) | 225  (90) |  | 206  (82) | 202  (81) | 210  (84) |
| Education level |  |  |  |  |  |  |  |  |
| No school studies: n (%) |  | 16  (6) | 20  (8) | 16  (6) |  | 15  (6) | 13  (5) | 15  (6) |
| Some studies: n (%) |  | 155  (62) | 159  (64) | 162  (65) |  | 134  (54) | 142  (57) | 145  (58) |
| High school complete: n (%) |  | 52  (21) | 48  (19) | 54  (22) |  | 71  (28) | 63  (25) | 58  (23) |
| University: n (%) |  | 27  (11) | 23  (9) | 18  (7) |  | 30  (12) | 32  (13) | 32  (13) |

aDS, dry season; bRS, rainy season

**Table S2. House Index (HI)**

| **Study site** | **Season-Year** | **Total houses** | **Positive houses** | **HI** | **Z** | **p-value** |
| --- | --- | --- | --- | --- | --- | --- |
| Rural | DSa 2022 | 250 | 53 | 21.2% | 1.01 | 0.3 |
| Urban | DS 2022 | 250 | 44 | 17.6% |  |  |
| Rural | DS 2023 | 250 | 116 | 46.4% | 5.14 | < 0.001 |
| Urban | DS 2023 | 250 | 61 | 24.4% |  |  |
| Rural | RSb 2022 | 250 | 148 | 59.2% | 3.66 | < 0.001 |
| Urban | RS 2022 | 250 | 107 | 42.8% |  |  |
| Rural | RS 2023 | 250 | 147 | 58.8% | 3.93 | < 0.001 |
| Urban | RS 2023 | 250 | 103 | 41.2% |  |  |

aDS, dry season; bRS, rainy season. Comparisons between Rural-Urban for same Season-Year

**Table S3. Container Index (CI)**

| **Study site** | **Season-Year** | **Total containers** | **Positive containers** | **CI** | **Z** | **p-value** |
| --- | --- | --- | --- | --- | --- | --- |
| Rural | DSa 2022 | 943 | 62 | 6.6% | -1.3782 | 0.2 |
| Urban | DS 2022 | 604 | 51 | 8.4% |  |  |
| Rural | DS 2023 | 1,047 | 186 | 17.8% | 2.5031 | 0.01 |
| Urban | DS 2023 | 659 | 87 | 13.2% |  |  |
| Rural | RSb 2022 | 785 | 284 | 36.2% | 3.1786 | 0.001 |
| Urban | RS 2022 | 608 | 171 | 28.1% |  |  |
| Rural | RS 2023 | 1,294 | 418 | 32.3% | 4.0973 | < 0.001 |
| Urban | RS 2023 | 787 | 188 | 23.9% |  |  |

aDS, dry season; bRS, rainy season. Comparisons between Rural-Urban for same Season-Year

**Table S4. Breteau Index (BI)**

| **Study site** | **Season-Year** | **Positive containers** | **St. Dev.** | **BI** | **t** | **p-value** |
| --- | --- | --- | --- | --- | --- | --- |
| Rural | DSa 2022 | 62 | 0.52 | 0.25 | 1.1 | 0.3 |
| Urban | DS 2022 | 51 | 0.48 | 0.20 |  |  |
| Rural | DS 2023 | 186 | 1.03 | 0.74 | 4.9 | < 0.001 |
| Urban | DS 2023 | 87 | 0.71 | 0.35 |  |  |
| Rural | RSb 2022 | 284 | 1.44 | 1.14 | 4.2 | < 0.001 |
| Urban | RS 2022 | 171 | 0.97 | 0.68 |  |  |
| Rural | RS 2023 | 418 | 2.40 | 1.67 | 5.4 | < 0.001 |
| Urban | RS 2023 | 188 | 1.25 | 0.75 |  |  |

aDS, dry season; bRS, rainy season. Comparisons between Rural-Urban for same Season-Year

**Table S5. Pupae per house index (PHI)**

| **Study site** | **Season-Year** | **Positive containers** | **St. Dev.** | **BI** | **t** | **p-value** |
| --- | --- | --- | --- | --- | --- | --- |
| Rural | DSa 2022 | 270 | 6.87 | 1.08 | 1.9 | 0.05 |
| Urban | DS 2022 | 57 | 1.18 | 0.23 |  |  |
| Rural | DS 2023 | 466 | 6.54 | 1.86 | 1.6 | 0.1 |
| Urban | DS 2023 | 249 | 5.16 | 1.00 |  |  |
| Rural | RSb 2022 | 966 | 14.18 | 3.86 | 3.2 | 0.001 |
| Urban | RS 2022 | 228 | 4.18 | 0.91 |  |  |
| Rural | RS 2023 | 1260 | 12.22 | 5.04 | 3.4 | < 0.001 |
| Urban | RS 2023 | 503 | 7.20 | 2.01 |  |  |

aDS, dry season; bRS, rainy season. Comparisons between Rural-Urban for same Season-Year

**Table S6. Pupae per container index (PCI)**

| **Study site** | **Season-Year** | **Total containers** | **Total Pupae** | **PCI** | **Rate ratio** | **95%CI** | **p-value** |
| --- | --- | --- | --- | --- | --- | --- | --- |
| Rural | DSa 2022 | 943 | 270 | 0.29 | 3.0 | 2.3-4.0 | < 0.001 |
| Urban | DS 2022 | 604 | 57 | 0.09 |  |  |  |
| Rural | DS 2023 | 1,047 | 466 | 0.45 | 1.2 | 1.0-1.4 | 0.04 |
| Urban | DS 2023 | 659 | 249 | 0.38 |  |  |  |
| Rural | RSb 2022 | 785 | 966 | 1.23 | 3.3 | 2.8-3.8 | < 0.001 |
| Urban | RS 2022 | 608 | 228 | 0.38 |  |  |  |
| Rural | RS 2023 | 1,294 | 1260 | 0.97 | 1.5 | 1.4-1.7 | < 0.001 |
| Urban | RS 2023 | 787 | 503 | 0.64 |  |  |  |

aDS, dry season; bRS, rainy season. Comparisons between Rural-Urban for same Season-Year

**Table S7. Pupae per person index (PPI)**

| **Study site** | **Season-Year** | **Total persons** | **Total Pupae** | **PPI** | **Rate ratio** | **95%CI** | **p-value** |
| --- | --- | --- | --- | --- | --- | --- | --- |
| Rural | DSa 2022 | 1,105 | 270 | 0.24 | 5.5 | 4.2-7.4 | < 0.001 |
| Urban | DS 2022 | 1,286 | 57 | 0.04 |  |  |  |
| Rural | DS 2023 | 1,119 | 466 | 0.42 | 2.1 | 1.8-2.5 | < 0.001 |
| Urban | DS 2023 | 1,263 | 249 | 0.20 |  |  |  |
| Rural | RSb 2022 | 1,174 | 966 | 0.82 | 4.8 | 4.1-5.5 | < 0.001 |
| Urban | RS 2022 | 1,320 | 228 | 0.17 |  |  |  |
| Rural | RS 2023 | 1,129 | 1260 | 1.12 | 2.9 | 2.7-3.3 | < 0.001 |
| Urban | RS 2023 | 1,328 | 503 | 0.38 |  |  |  |

aDS, dry season; bRS, rainy season. Comparisons between Rural-Urban for same Season-Year
